## Erratum

Dagenbach, E. M. and Endow, S. A. (2004). A new kinesin tree. *J. Cell Sci.* **117**, 3-7.

The neck analysis entries in Table 1 were not aligned correctly in both the print and online versions of this paper. The corrected Table 1 is shown below. We apologise for any inconvenience caused.

**Table 1. Analysis of previously unclassified kinesin proteins for assignment to groups**

| Group                  | Proteins compared to | Protein      | Motor position* | Motor sequence ID (%) | Predicted coiled-coil position† | Notes                                                                                        | Neck analysis‡                          |  |
|------------------------|----------------------|--------------|-----------------|-----------------------|---------------------------------|----------------------------------------------------------------------------------------------|-----------------------------------------|--|
| At1                    | AtF3K23.6            | AtF24M12.190 | N               | 66.9                  | 380-425                         |                                                                                              |                                         |  |
|                        |                      | AtK1L20.9    | N               | 67.1                  | 383-434                         |                                                                                              |                                         |  |
|                        |                      | AtT19F6.160  | N               | 66.6                  | 329-360                         |                                                                                              |                                         |  |
|                        |                      | AtMDH9.19    |                 |                       | 52.9                            | None                                                                                         |                                         |  |
|                        |                      | AtF19H22.50  | N               | 76.6                  | 336-365                         |                                                                                              |                                         |  |
|                        |                      | AtF7K15.60   | N               | 55.0                  | 385-434                         |                                                                                              |                                         |  |
|                        |                      | AtF15H18.12  | N               | 44.9                  | 418-464                         |                                                                                              | 1 aa missing from alignment             |  |
| At2                    | AtF3K23.14           | AtF3K23.6    | N               | 100                   | 364-393                         |                                                                                              |                                         |  |
|                        |                      | AtF19H22.150 | N               | 73.8                  | 489-580                         |                                                                                              |                                         |  |
|                        |                      | AtT21B14.15e | N               | 74.2                  | 385-426                         |                                                                                              |                                         |  |
|                        |                      | AtF15M7.20   | N               | 72.0                  | 394-432                         |                                                                                              |                                         |  |
|                        |                      | AtF8K7.17    | N               | 76.7                  | 394-474                         |                                                                                              |                                         |  |
| Unnamed At group       | AtF28P10.150         | AtF3K23.14   | N               | 100                   | 422-513                         |                                                                                              |                                         |  |
|                        |                      | AtF22M8.8    | N               | 65.7                  | 423-452                         |                                                                                              |                                         |  |
| Unnamed At group       | AtPAKRP1             | AtF5011.15   | N               | 69.7                  | 466-495                         |                                                                                              |                                         |  |
|                        |                      | AtF28P10.150 | N               | 100                   | 473-524                         |                                                                                              |                                         |  |
|                        |                      | AtMAL21.18   | N               | 44.1                  | 421-453                         |                                                                                              |                                         |  |
| Unnamed At group       | AtT15B3.190          | AtMDB19.17   | N               | 89.6                  | 439-468                         | Phragmoplast-associated                                                                      |                                         |  |
|                        |                      | AtPAKRP1     | N               | 100                   | 1044-1073                       | Phragmoplast-associated                                                                      |                                         |  |
| Unnamed At group       | AtT15B3.190          | AtMGD8.20    | N               | 64.9                  | 494-527                         |                                                                                              |                                         |  |
|                        |                      | AtK13E13.17  | N               | 64.1                  | 771-805                         |                                                                                              |                                         |  |
| Unnamed At group       | AtT1E22.130          | AtT15B3.190  | N               | 100                   | 578-609                         |                                                                                              |                                         |  |
|                        |                      | AtMRO11.5    | N               | 34.5                  | None                            | Grouped by bootstrap                                                                         |                                         |  |
| BimC                   | AnBimC               | AtT1E22.130  |                 | 100                   | None                            |                                                                                              |                                         |  |
|                        |                      | PMAL3P6.13   | N               | 37.0                  | None                            |                                                                                              |                                         |  |
|                        |                      | HsKIF8       |                 |                       | (53.5)                          |                                                                                              | Partial sequence                        |  |
|                        |                      | AtKRP125a    | N               | 50.1                  | (438-467)<br><i>P</i> =0.41     |                                                                                              |                                         |  |
|                        |                      | AtKRP125b    | N               | 50.8                  | 406-477                         |                                                                                              | GenBank identifies as cytokinesis motor |  |
| CENP-E                 | HsCENP-E             | AtKRP125c    | N               | 53.3                  | 438-518                         | GenBank identifies as spindle motor                                                          |                                         |  |
|                        |                      | AtF16L2.60   | N               | 50.1                  | 433-523                         |                                                                                              |                                         |  |
|                        |                      | DmCana       | N               | 40.4                  | 487-536                         | Kinetochore motor (Yucel et al 2000)                                                         |                                         |  |
|                        |                      | DmCmeta      | N               | 48.1                  | 333-374                         | Kinetochore motor (Yucel et al 2000)                                                         |                                         |  |
| Chromokinesin/<br>KIF4 | HsKIF4               | AtF14P13.22  | N               | 49.3                  | 364-410                         | GenBank identifies as putative kinesin-like centromere protein                               |                                         |  |
|                        |                      | AtZCF125     | N               | 51.0                  | 359-414                         |                                                                                              |                                         |  |
|                        |                      | HsNYREN62    | N               | 50.7                  | 467-509                         |                                                                                              |                                         |  |
| Unnamed Hs group       | HsKIAA1236           | AtMSL3.5     | N               | 49.5                  | 581-615                         | Group supported by neighbor-joining bootstrap value of 95% and high % sequence ID to HsKIF4  |                                         |  |
|                        |                      | AtMCA23.16   | N               | 47.2                  | 539-573                         |                                                                                              |                                         |  |
|                        |                      | AtF11CI.80   | N               | 50.4                  | 411-443                         |                                                                                              |                                         |  |
| KHC                    | DmKHC                | HsKIAA1236   |                 | 100                   | None                            | May not be full-length sequence                                                              |                                         |  |
|                        |                      | HsLOC343489  |                 | 54.4                  | None                            |                                                                                              |                                         |  |
| Kip3                   | ScKip3               | AtMAA21.110  | N               | 40.6                  | 374-418                         | Bootstrap values do not support placement in KHC group                                       |                                         |  |
|                        |                      | PfMAL3P7.1   | N               | 41.9                  | 594-629                         |                                                                                              |                                         |  |
|                        |                      | HsKIF18      | N               | 47.7                  | None                            |                                                                                              |                                         |  |
|                        |                      | AtF25II6.11  | N               | 44.7                  | 502-540                         | Bootstrap values do not support placement in Kip3 group                                      |                                         |  |
|                        |                      | DmKlp67A     | N               | 43.6                  | 362-398                         |                                                                                              |                                         |  |
|                        |                      | DmKIF19A     | N               | 39.0                  | 550-598                         |                                                                                              |                                         |  |
|                        |                      | HsFLJ37300   | N               | 45.4                  | 420-451                         | DmKIF19A listed in alignment as DmKlp19A                                                     |                                         |  |
| KRP85/95               | CeOsm3               | PfMAL1P2.11  | N               | 46.6                  | 1412-1442                       |                                                                                              |                                         |  |
|                        |                      | HsKIAA1405   | N               | 58.3                  | 368-411                         | Group supported by neighbor-joining bootstrap value of 100% and high % sequence ID to CeOsm3 |                                         |  |
|                        |                      | DmKIF3C      | N               | 50.9                  | (351-380)<br><i>P</i> =0.44     |                                                                                              |                                         |  |

Table 1. Continued

| Group            | Proteins compared to | Protein      | Motor position* | Motor sequence ID (%) | Predicted coiled-coil position† | Notes                                                                               | Neck analysis‡                    |
|------------------|----------------------|--------------|-----------------|-----------------------|---------------------------------|-------------------------------------------------------------------------------------|-----------------------------------|
| MCAK/ KIF2       | HsMCAK               | HsKlp17q22   | Central         | 67.7                  | None                            |                                                                                     |                                   |
|                  |                      | DmKlp59D     | Central         | 61.7                  | None                            |                                                                                     |                                   |
|                  |                      | AtMGL6.9     | Central         | 52.1                  | 705-741                         |                                                                                     |                                   |
| MKLP1            | DmPAV                | AtMSL1.9     | Central         | 53.3                  | 596-627                         |                                                                                     |                                   |
|                  |                      | PtL2165w     | (Central)       | 45.3                  | None                            | Motor towards N terminus                                                            |                                   |
|                  |                      | HsKlpMPP1    | N               | 33.2                  | 568-607                         |                                                                                     |                                   |
| Unc104/ KIF1     | CeUnc104             | HsRabK6      | N               | 27.0                  | 680-718                         | Bootstrap values and % sequence ID to DmPav do not support placement in MKLP1 group |                                   |
|                  |                      | AtT20H2.17   | (N)             | 13.5                  | (839-868)                       |                                                                                     | P=0.49                            |
|                  |                      | HsKIF1B      | N               | 70.6                  | 504-533                         |                                                                                     |                                   |
| C-Terminal motor | AtKATD               | HsGAKIN      | N               | 58.5                  | 612-644                         | Sequence only ~65 aa longer than motor domain, may not be full length               |                                   |
|                  |                      | HsRBKIN1     | N               | 57.5                  | 391-420                         |                                                                                     |                                   |
|                  |                      | HsKIF16B     | N               | 49.7                  | None                            |                                                                                     | P<0.4                             |
| C-Terminal motor | AtKATD               | AtT12M4.14   | N               | 67.3                  | 750-788                         | Coiled-coil after motor domain<br>Groups with AtKatD by bootstrap                   | + + + G+<br>KICNKSNECITGS         |
|                  |                      | AtF15H18.10  | C               | 62.1                  | 433-523                         |                                                                                     | ++L N + +L+GN<br>NQKLFNELQELKGN   |
|                  |                      | AtF25P22.28  | C               | 63.8                  | 352-444                         |                                                                                     | ++L N + +L+GN<br>NRKLFNELQELKGN   |
|                  |                      | AtF24D7.17   | C               | 62.1                  | 285-384                         |                                                                                     | + L+N V +L+GN<br>NRRLYNEVQELKGN   |
|                  |                      | AtK1013.11   | C               | 61.5                  | 276-331                         |                                                                                     | + L+N V +L+GN<br>NRRLYNEVQELKGN   |
|                  |                      | AtF14P13.9   | Central         | 55.8                  | None                            | Neck present<br>Groups with AtKatD by bootstrap                                     | ++L+N V DL+GN<br>NRKLYNMVQDLKGN   |
|                  |                      | HsKIFC2      | C               | 37.8                  | 270-320                         | C-terminal motor                                                                    | + +L+GN<br>PAGCPGRPELPELKGN       |
|                  |                      | AtT9I22.5    | C               | 39.9                  | 388-430                         | C-terminal motor<br>Neck present                                                    | RKEL+N + + +GN<br>RKELYNHIEQETKGN |
|                  |                      | AtF15A18.10  | N               | 51.9                  | 375-410                         | Coiled-coil after motor domain<br>Neck present                                      | RK L+N V++L+GN<br>RKRYLYNEVIELKGN |
|                  |                      | AtT9N14.6    | C               | 52.0                  | 341-373                         |                                                                                     | RKEL+N +++L+GN<br>RKELYNKILELKGN  |
|                  |                      | AtF15F15.20  | C               | 42.2                  | 35-78                           | C-terminal motor<br>Neck present                                                    | RK++ N ++D +G+<br>RKQVLNKI IDTKGS |
|                  |                      | AtF12B17.180 | C               | 36.4                  | 57-92                           | C-terminal motor<br>Neck present                                                    | +K L N ++ +GN<br>KKRFLFNDLLTAKGN  |
|                  |                      | AtMNA5.20    | C               | 33.8                  | 52-85                           | C-terminal motor<br>Neck present                                                    | +K L N ++ +GN<br>KKRFLFNDLLTAKGN  |
|                  |                      | AtC17L7.110  | C               | 44.5                  | 383-413                         | C-terminal motor<br>Neck present                                                    | RK+LHNT+++L+GN<br>RKKLHNTILELKGN  |

\*Position of motor domain in protein and/or relative to predicted coiled-coil.

†Coiled-coil predicted by PAIRCOIL ( $P \geq 50\%$ ). Coiled-coil position is that closest to the end of the motor domain for N-terminal motors and the beginning of the motor domain for C-terminal motors.

‡Sequence similarity to DmNcd neck, the region adjacent to the beginning of the conserved motor domain (RKELHNTVMDLRGN; top); sequence at bottom from corresponding region of protein under analysis.
